# Supplementary material
Source: Springer Nature journal article supplement (https://www.springermedizin.de/resource/supplementary/12879_2008_757_MOESM2_ESM.pdf/9449316)

**Isoniazid**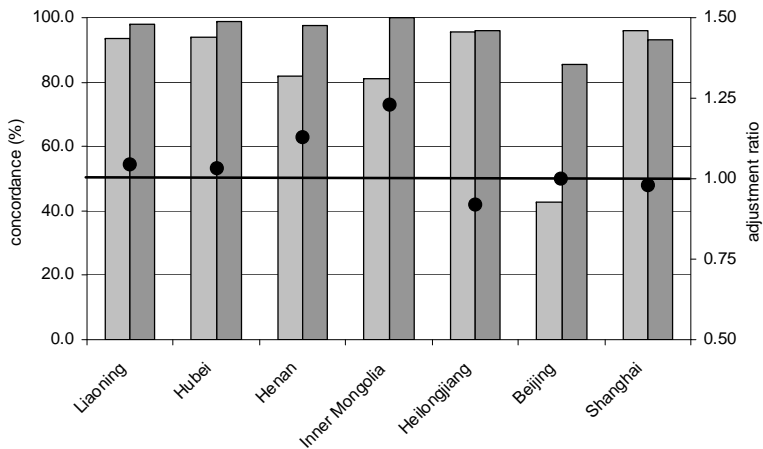**Rifampicin**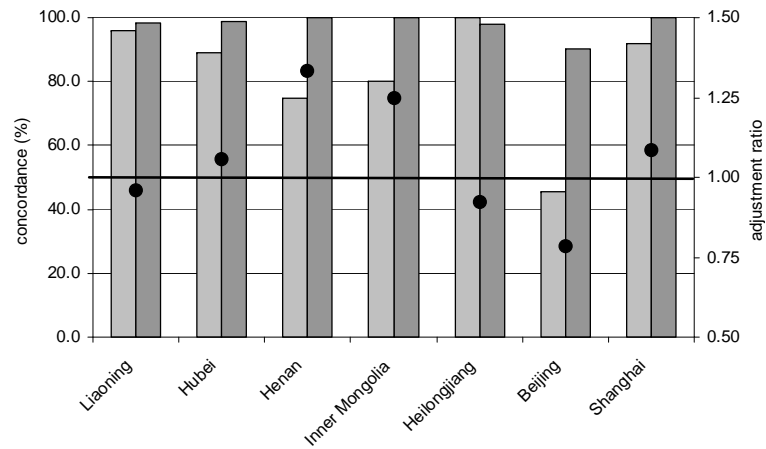**Streptomycin**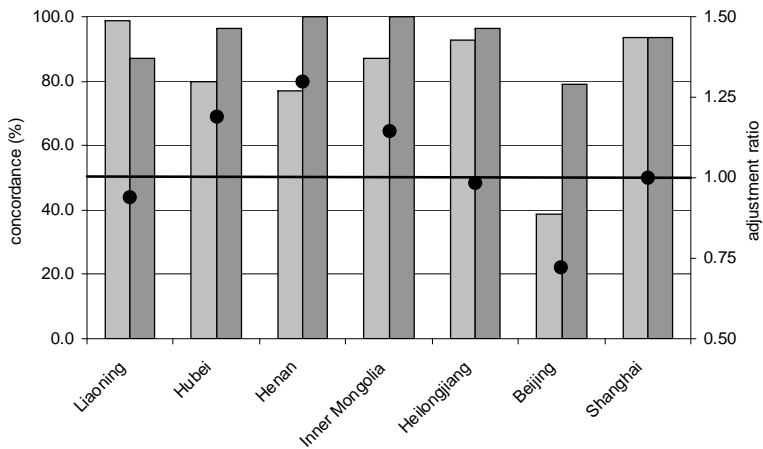**Ethambutol**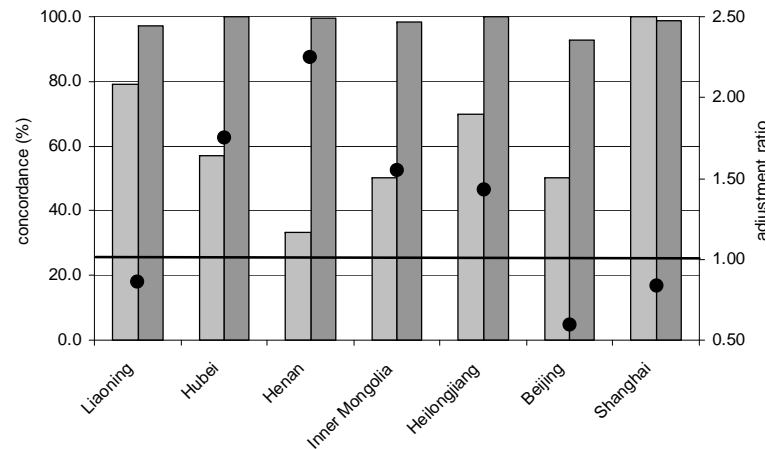

Supplement: MOESM2 [file 9449316]
